# Supplementary material for: Solvent accessible surface area-assessed molecular basis of osmolyte-induced protein stability
Source: Royal Society of Chemistry journal article supplement (doi:10.1039/d4ra02576h), 2024-01-01
Supplement: d4ra02576h1.pdf [file d4ra02576h1.pdf]

# Supporting Information: Solvent accessible surface area-assessed molecular basis of osmolyte-induced protein stability

Shampa Raghunathan\*

*École Centrale School of Engineering, Mahindra University, Hyderabad 500043, India*

E-mail: shampa.raghunathan@mahindrauniversity.edu.in

## 1 Methods and models

**3-site model.** Given that the three peptide interaction sites (i, j, k) are independent (i.e., interaction energies of each site are additive), the total degeneracy,  $\Omega_{ijk}$ , of a specific microstate can be written as product of their SAs at particular peptide-interaction site (as proposed by Street et al., Proc. Natl. Acad. Sci. USA 2006, 103, 13997) :

$$\Omega_{ijk} = SA_i \cdot SA_j \cdot SA_k \quad (1)$$

In the case of aqueous-osmolyte solutions, the total SAs will have contributions from both the solvents. In  $Y$  molar ( $Y$  M) osmolyte solution:

$$SA_i = 55.5 \cdot SA_{w,i} + Y \cdot SA_{o,i} \quad (2)$$

$$SA_j = 55.5 \cdot SA_{w,j} + Y \cdot SA_{o,j} \quad (3)$$

$$SA_k = 55.5 \cdot SA_{w,k} + Y \cdot SA_{o,k} \quad (4)$$

Here,  $SA_w$  and  $SA_o$  refer surface areas coming from water and osmolyte, respectively. The probability of any specific microstate is given by

$$p_{ijk} = \frac{\Omega_{ijk} e^{-E_{ijk}/k_B T}}{\sum_i \sum_j \sum_k \Omega_{ijk} e^{-E_{ijk}/k_B T}} \quad , \quad (5)$$

where  $k_B$  is Boltzmann's constant and  $T$  is 298.15 K. These probabilities can be used to get the average energy of the system

$$\langle E \rangle = \sum_i \sum_j \sum_k E_{ijk} \cdot p_{ijk} \quad , \quad (6)$$

and  $\Delta G_{tr}$  is calculated by the difference between the average system energy at 0 and  $n$  M osmolyte concentrations

$$\Delta G_{tr} = \langle E \rangle_{water} - \langle E \rangle_{osmolyte} \quad . \quad (7)$$

The average osmolyte occupancy on an interaction site can be computed as

$$\langle O_{pref} \rangle = \sum_i \sum_j \sum_k p_{ijk} \left( \frac{SA_{o,i}}{SA_{o,i} + SA_{w,i}} + \frac{SA_{o,j}}{SA_{o,j} + SA_{w,j}} + \frac{SA_{o,k}}{SA_{o,k} + SA_{w,k}} \right) \quad (8)$$

whereas, in the bulk it is

$$\langle O_{bulk} \rangle = \left( \frac{SA_o}{SA_o + SA_w} \right) \quad . \quad (9)$$

The difference between  $\langle O_{pref} \rangle$  and  $\langle O_{bulk} \rangle$  will give the local osmolyte concentration.

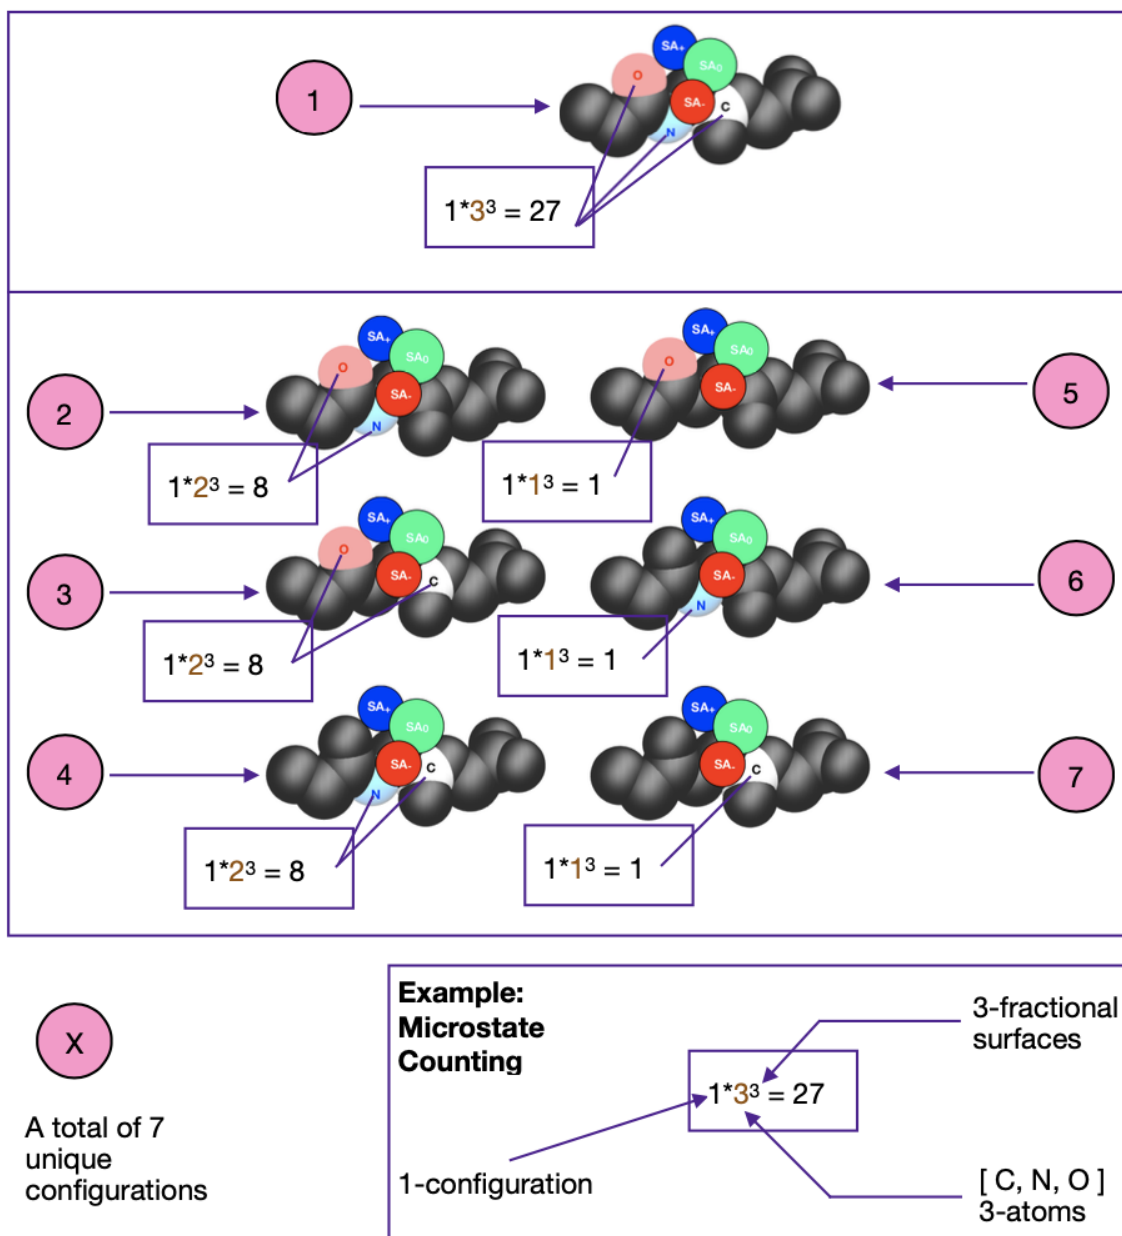

Figure S1: A 3-site model with solute atoms C, N, and O and solvent accessible surface areas with partially positive ( $SA_+$ ), negative ( $SA_-$ ), and neutral ( $SA_0$ ) charges as proposed in the current work. Unique configurations (sets/sub-sets), and an example of microstate counting shows contribution from each term. Here, the 3-site model has a total of  $(27 + 3 \times 8 + 3 \times 1) = 54$  microstates.

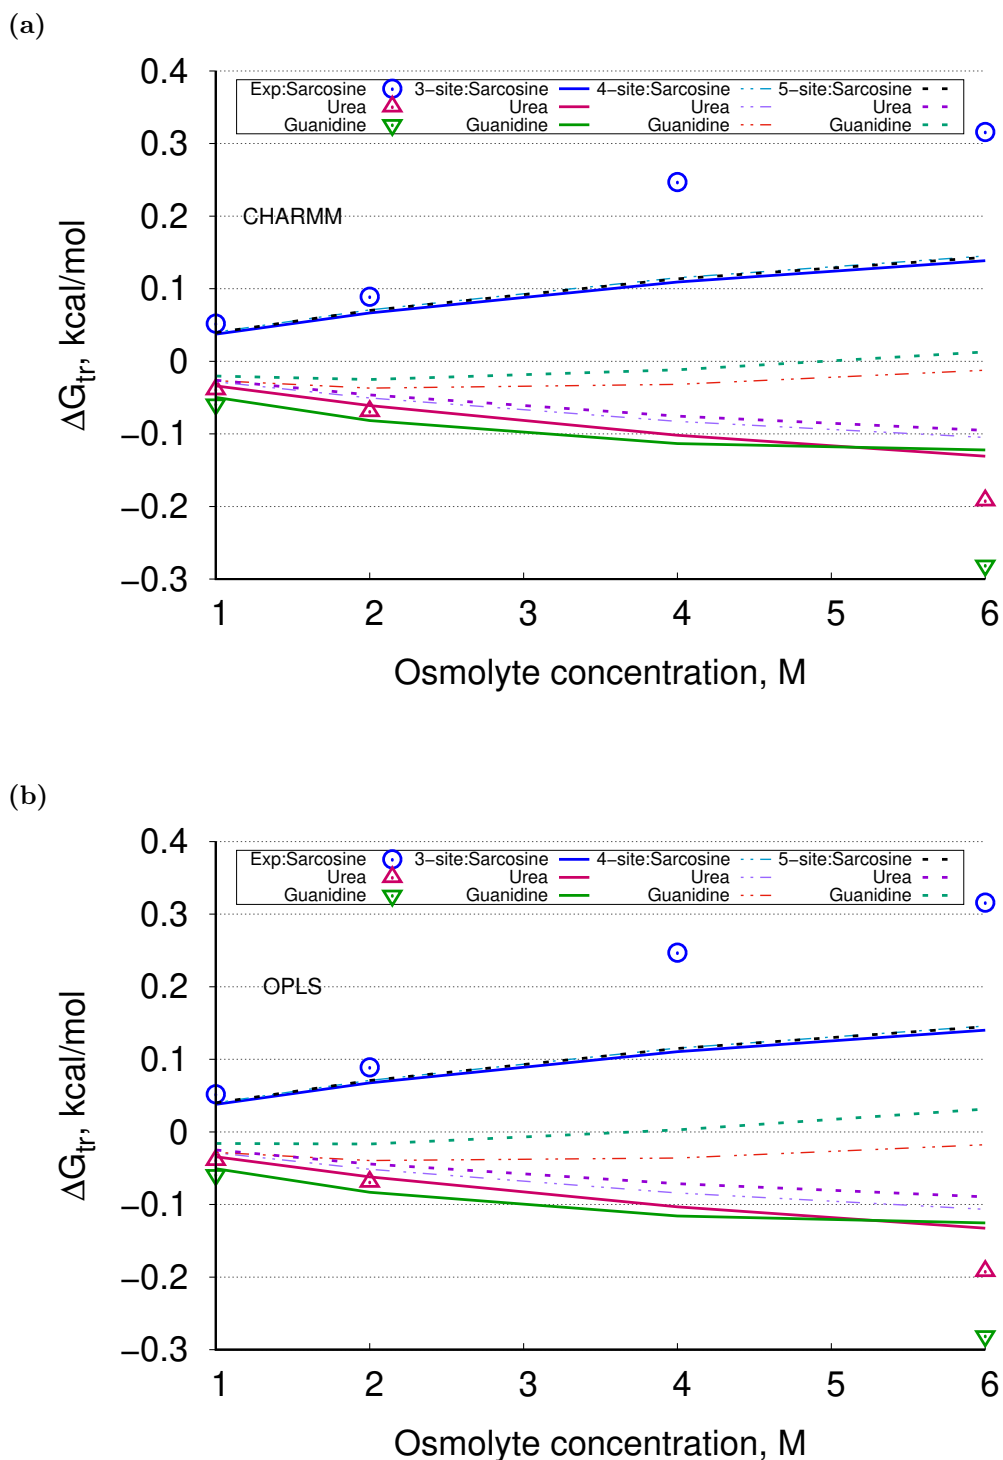

Figure S2: Calculated  $\Delta G_{tr}$  values for the backbone model as osmolyte concentration is increased from  $> 1$  M. Available experimental data are plotted using blue circles (sarcosine), magenta triangles (urea), and green inverted triangles (guanidine). Lines represent values calculated in this study using (a)CHARMM and (b)OPLS partial charges for various 3-site, 4-site and 5-site models.

## 2 Partial charges

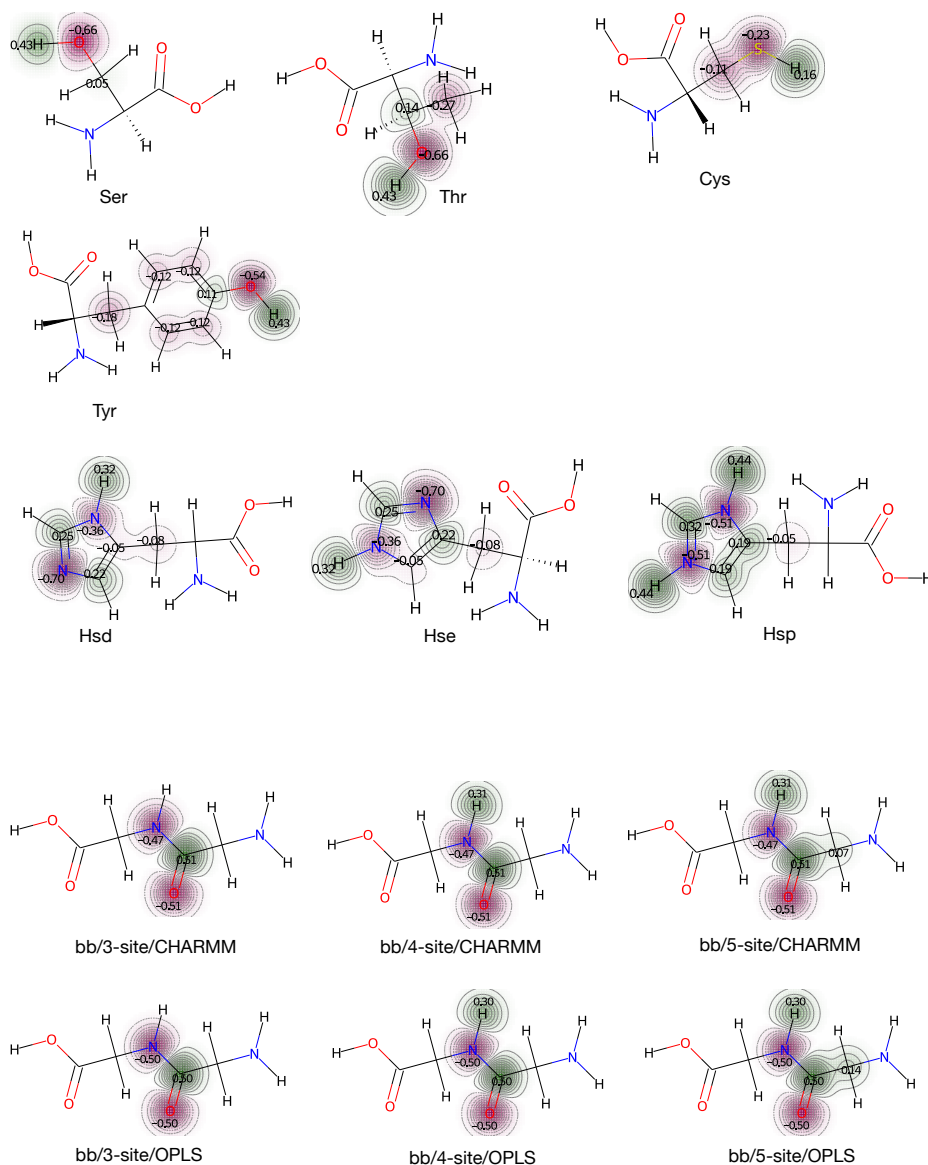

Figure S3: **Molecular electrostatics of amino acid side chains and backbone.** Atomic partial charges used in the CHARMM force field for Ser, Thr, Cys, Tyr, Hsd, Hse, and Hsp with an additional charge site on hydrogen atom. Backbone as 3-site, 4-site, and 5-site models with CHARMM/OPLS partial charges.

### 3 $\Delta G_{tr}$ values for $n$ -site models including hydrogen as an additional charge site

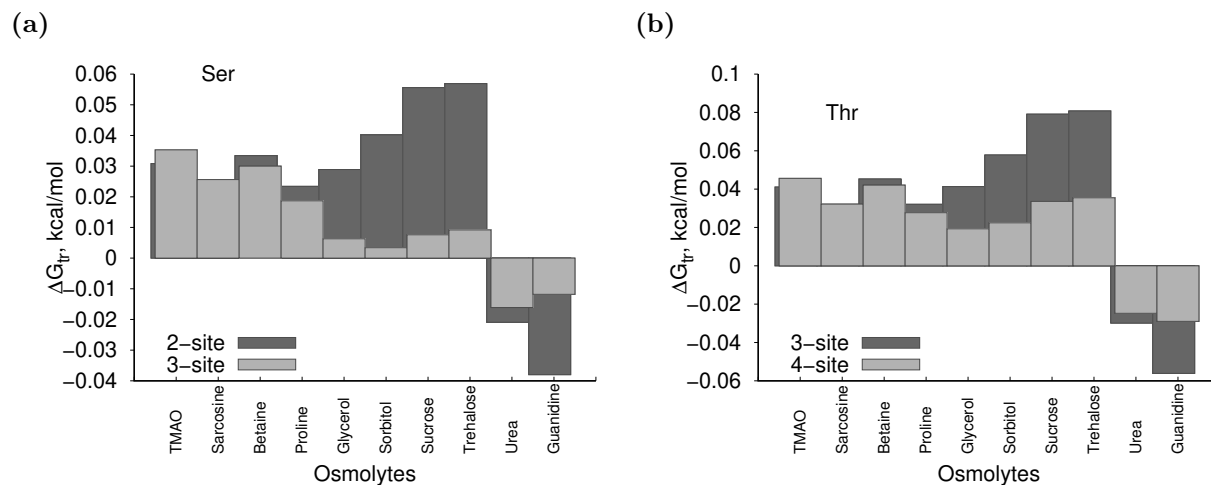

Figure S4: Computed  $\Delta G_{tr}$  values for varying  $n$ -site model of (a) Ser and (b) Thr.

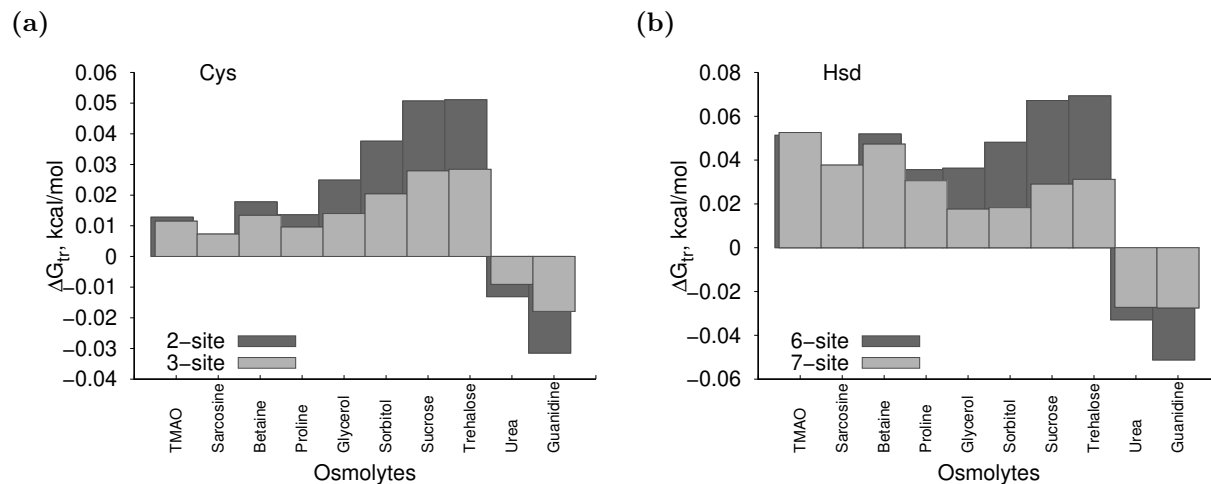

Figure S5: Computed  $\Delta G_{tr}$  values for varying  $n$ -site model of (a) Cys and (b) Hsd.

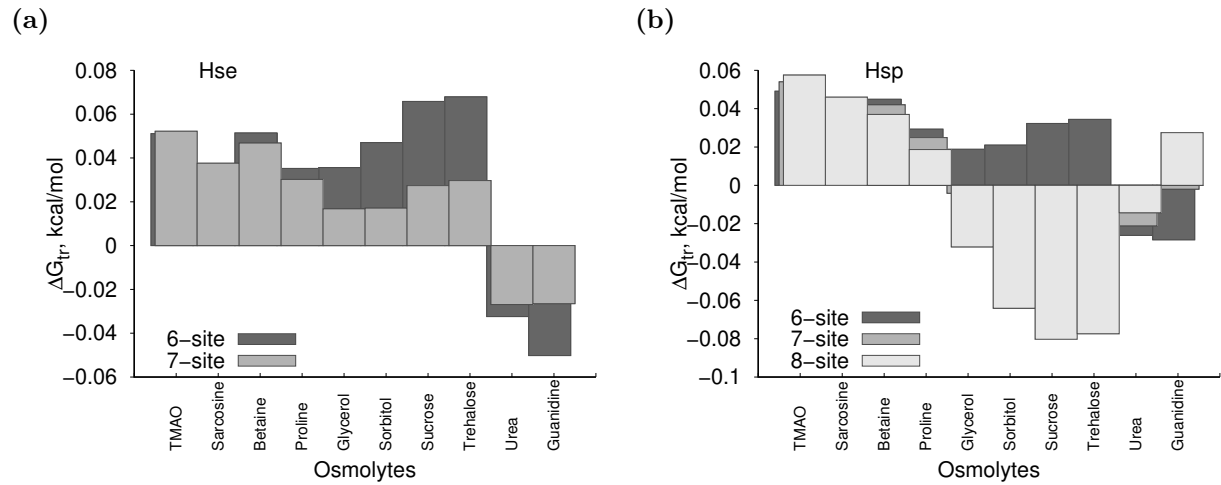

Figure S6: Computed  $\Delta G_{tr}$  values for varying  $n$ -site model of (a) Hse and (b) Hsp.
